# Supplementary material
Source: MDPI journal article supplement (https://www.mdpi.com/2076-3417/8/9/1505)

## Supplementary Materials

# Aqueous Garlic Extract as a Plant Biostimulant Enhances Physiology, Improves Crop Quality and Metabolite Abundance, and Primes the Defense Responses of Receiver Plants

Sikandar Hayat <sup>1,2</sup>, Husain Ahmad <sup>1</sup>, Muhammad Ali <sup>1</sup>, Kashif Hayat <sup>3</sup>, Muhammad Ali Khan <sup>4</sup> and Zhihui Cheng <sup>1,\*</sup>

<sup>1</sup> College of Horticulture, Northwest A&F University, Yangling 712100, China;

sikander@nwsuaf.edu.cn (S.H.); husain@nwafu.edu.cn (H.A.); muhammadali@nwafu.edu.cn (M.A.)

<sup>2</sup> College of Natural Resources and Environment, Northwest A&F University, Yangling 712100, China

<sup>3</sup> School of Agriculture and Biology, Key Laboratory of Urban Agriculture, Ministry of Agriculture, Bor S. Luh Food Safety Research Center, Shanghai Jiao Tong University, Shanghai 200240, China; khayat97@hotmail.com

<sup>4</sup> Department of Agriculture, Abdul Wali Khan University Mardan, KPK 23200, Pakistan; malikhan@awkum.edu.pk

\* Correspondence: chengzh@nwsuaf.edu.cn; Tel.: +86-151-2918-3300

Received: 10 August 2018; Accepted: 26 August 2018; Published: 29 August 2018

## Supplementary Figure

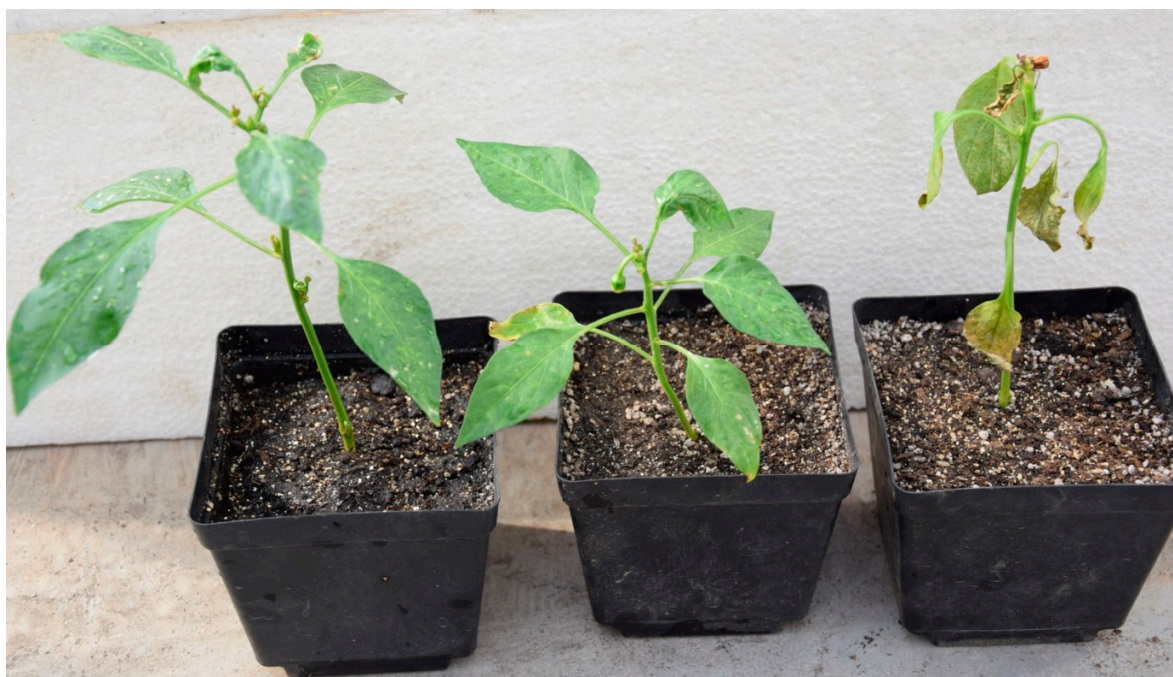

Supplement: s1 [file s1]
